# Supplementary material for: The Prosigna gene expression assay and responsiveness to adjuvant cyclophosphamide-based chemotherapy in premenopausal high-risk patients with breast cancer
Source: PubMed Central journal article supplement (PMC6062869; doi:10.1186/s13058-018-1012-0), 2018-07-27

Figure S1

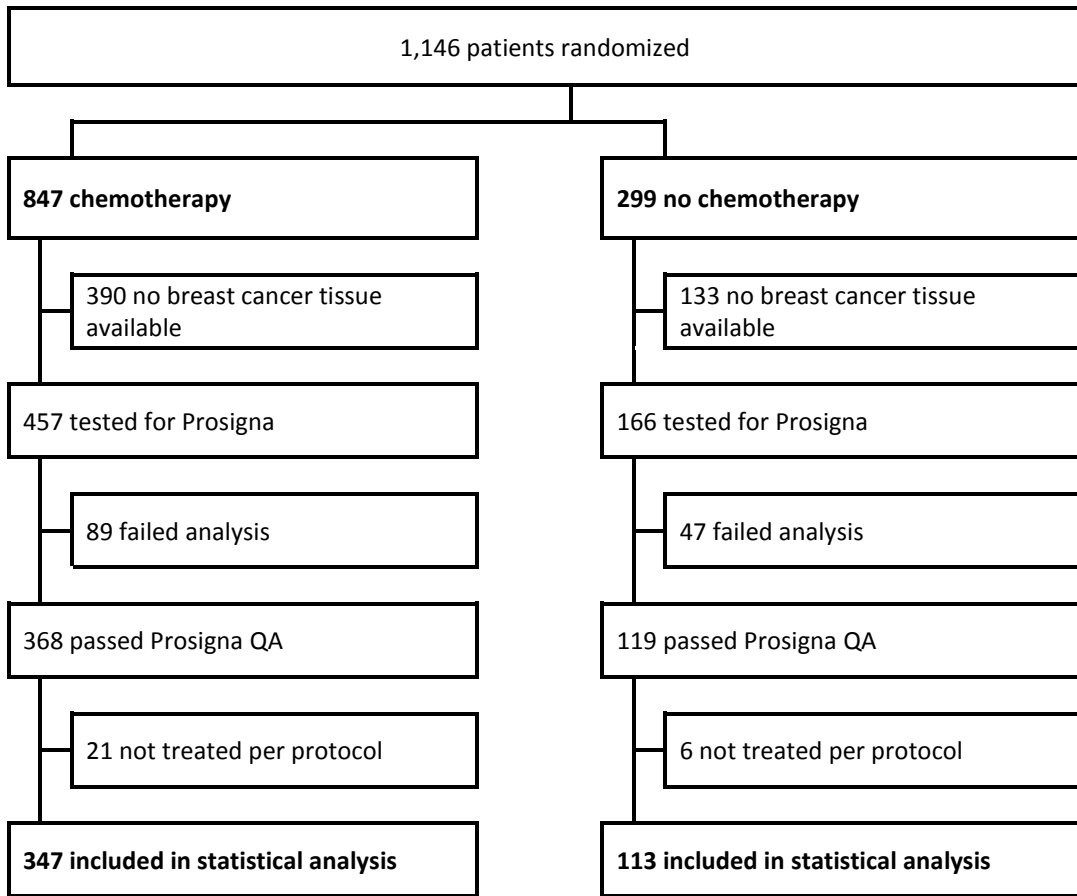

Supplement: 13058_2018_1012_MOESM1_ESM.pdf [file 13058_2018_1012_MOESM1_ESM.pdf]
